# Supplementary material for: Liquid–liquid phase separation for microencapsulation of native cytokine to enhance immune activation
Source: Royal Society of Chemistry journal article supplement (doi:10.1039/d3ma00405h), 2023-01-01
Supplement: d3ma00405h1.pdf [file d3ma00405h1.pdf]

## SUPPLEMENTARY MATERIALS

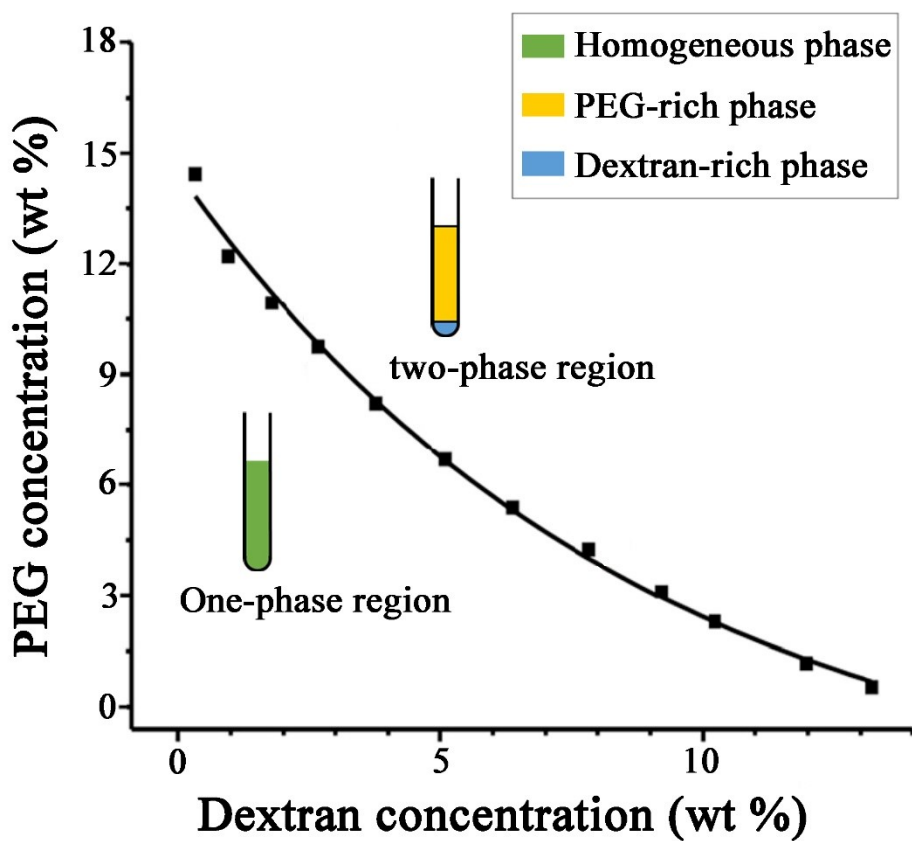

Figure S1. Phase graph of a classic aqueous biphasic system of PEG/Dextran.

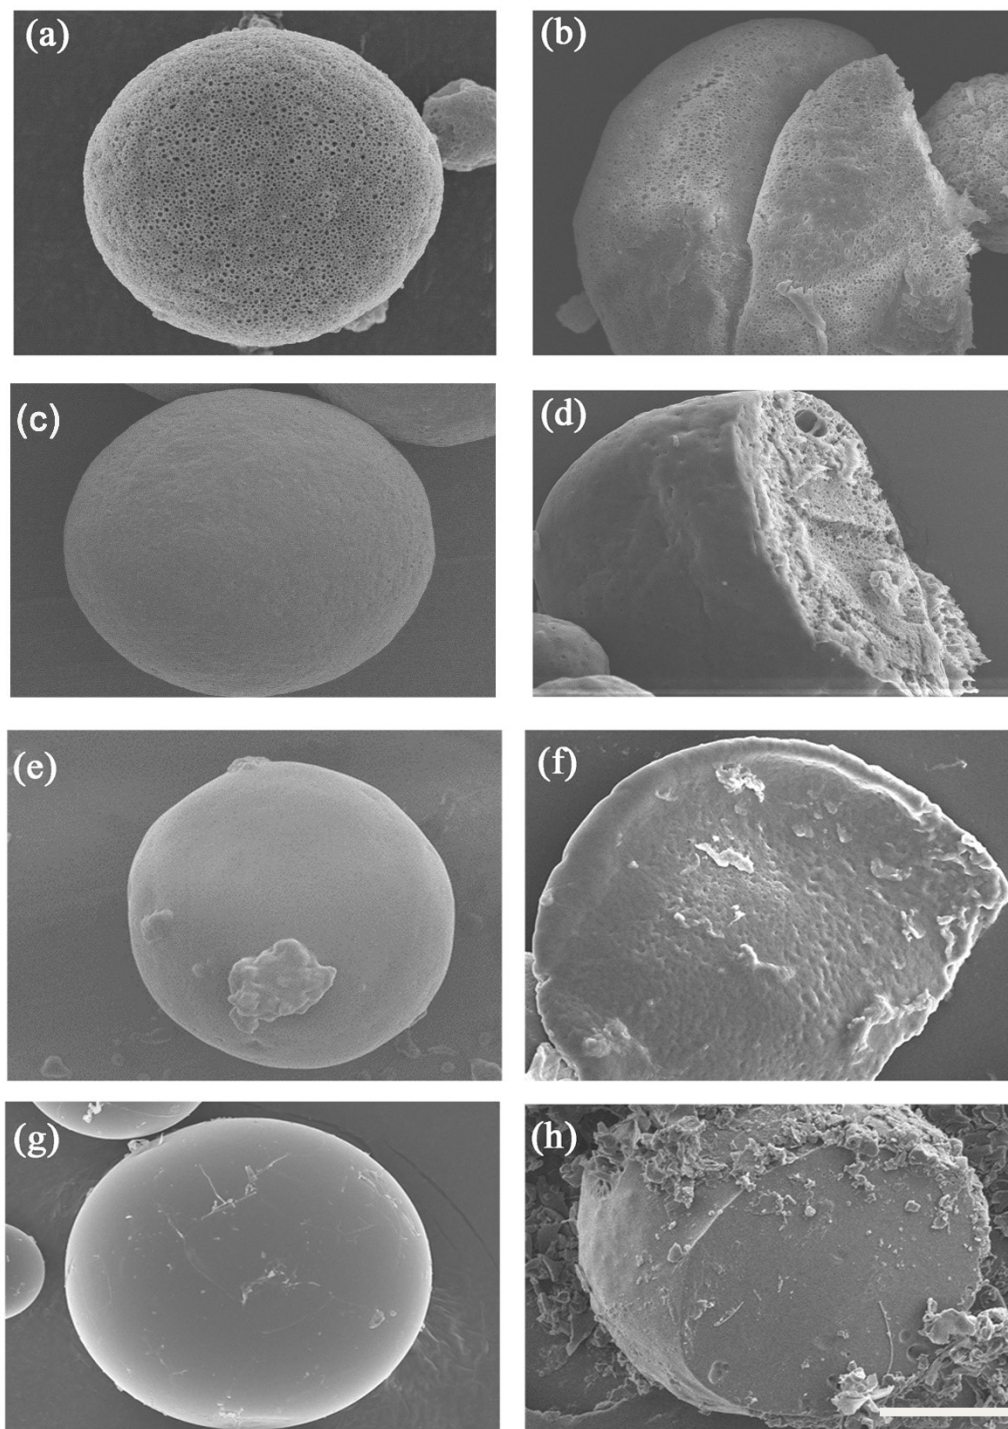

Figure S2. Scan electronic microscope (SEM) images of porous microparticles before and after treatment with different PEG-20kDa solutions. a, c, e, and g showed the morphology of microparticles. b, d, f, and h showed the section of internal microparticles. a, b) porous microparticles without with PEG-20kDa solutions. c, d) porous microparticle treated at 95% PEG-400Da at 25 °C for 15 mins (Closure-1). e, f) porous microparticle treated at 90% PEG-400Da at 42 °C for 2 hours (Closure-2). g, h) porous microparticle treated at 80% PEG-400Da at 42 °C for 4 hours. The scale bar is 20  $\mu\text{m}$ .
